# Supplementary material for: Preparation and characterization of an electrospun colon-specific delivery system for salmon calcitonin
Source: Royal Society of Chemistry journal article supplement (doi:10.1039/c8ra00385h), 2018-01-01
Supplement: c8ra00385h1.pdf [file c8ra00385h1.pdf]

## Supporting Material

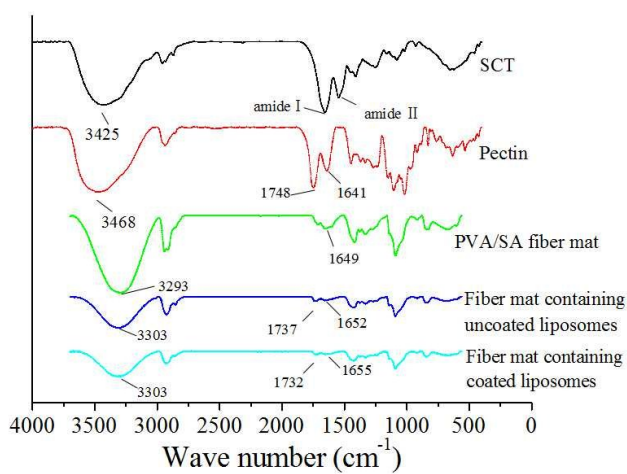

FigS.1. FTIR spectra of different samples

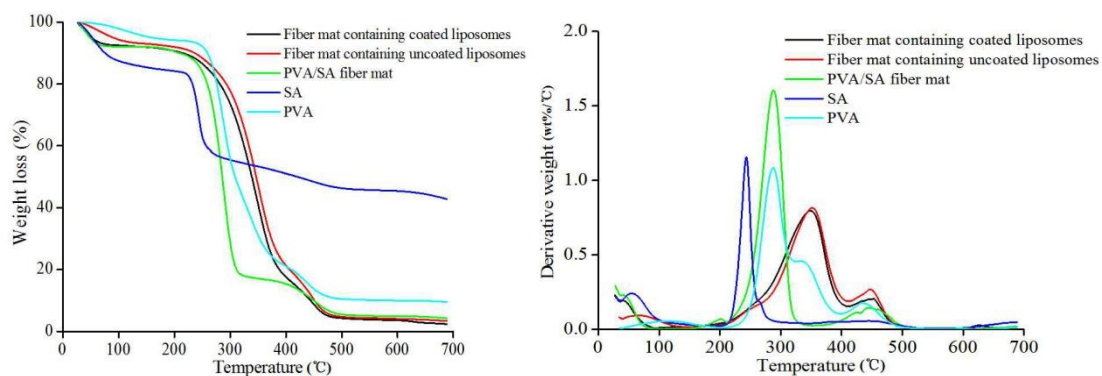

FigS.2. TG and DTG curves of different samples.
